# Supplementary material for: Nitrate deposition and preservation in the snowpack along a traversefrom coast to the ice sheet summit (Dome A) in East Antarctica
Source: Copernicus journal article supplement (doi:10.5194/tc-2017-227), 2017-10-20
Supplement: Supplementary file 1 [file tc-2017-227-supplement.pdf]

1 **Supporting Information:**

2 Supporting information includes two figures (Figures S1 and S2).

3

4

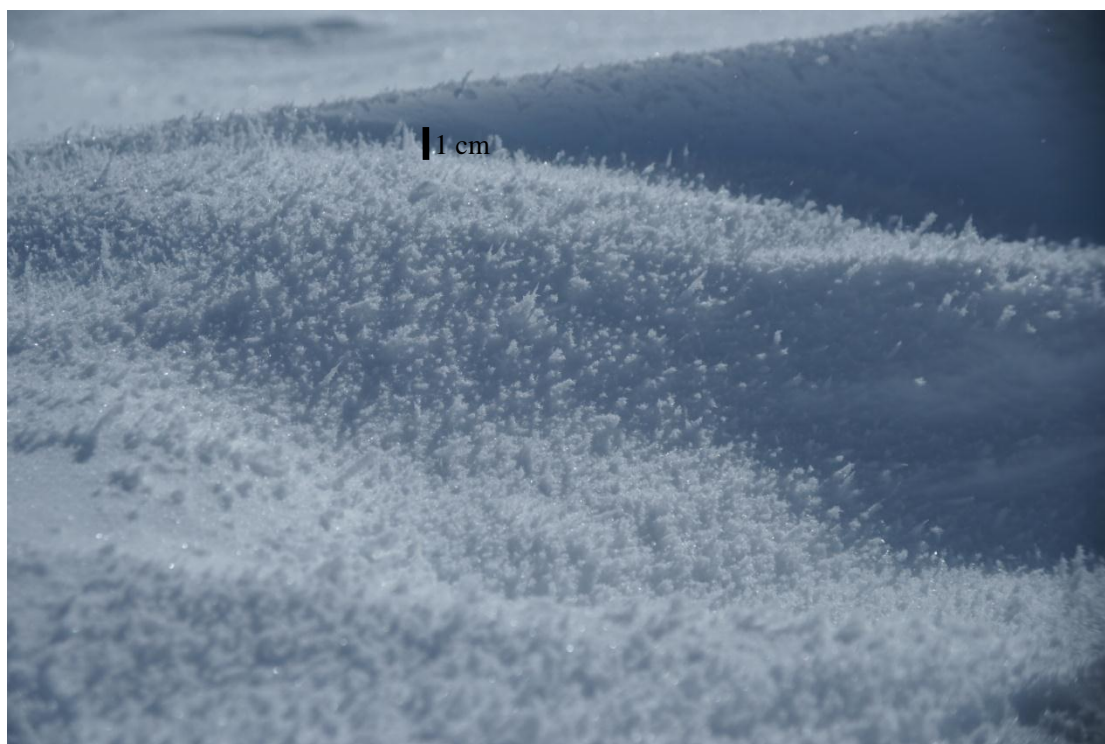

5

6 Figure S1 Surface morphology of the surface snow on Dome A plateau, East Antarctica. The needle  
7 crystal ice layer is extensively developed. In general, the depth of the crystal layer is  $< 1.0$  cm, and the  
8 snowpack is characterized by soft snow texture.

9

10

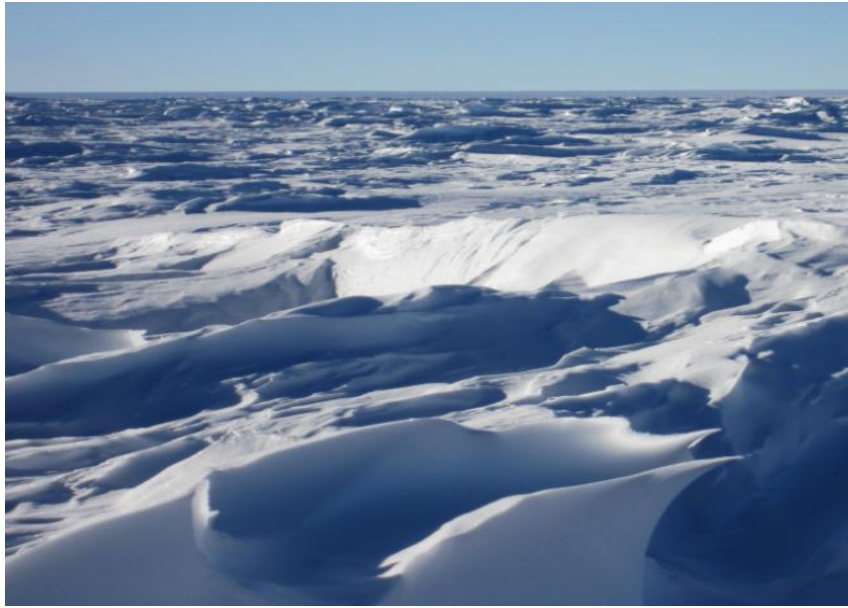

11

12 Figure S2 Surface morphology of the surface snow at ~600 km from the coast, on the traverse from  
13 Zhongshan to Dome A, East Antarctica. The large sastrugi with hard smooth surfaces is extensively  
14 developed in this region, mainly formed by wind erosion. The ridges of these sastrugi are typically  
15 parallel to the prevailing wind direction.

16
