# Supplementary material for: Nitrate deposition and preservation in the snowpack along a traversefrom coast to the ice sheet summit (Dome A) in East Antarctica
Source: Copernicus journal article supplement (doi:10.5194/tc-2017-227), 2017-10-20
Supplement: Supplementary file [file tc-2017-227-AC1-supplement.pdf]

## **Reviewer #1**

We thank the reviewer very much for the careful read of our manuscript. The constructive comments and suggestions have greatly improved the quality of this manuscript. Below, we give a point-by-point response to the comments and suggestions of the reviewer, in the order of (1) comments from Referees, (2) author's response, and (3) author's changes in manuscript (referee comments in black; author's response and changes in manuscript in blue).

### **(1) comments from Referees**

#### General comments

This study reports new measurements of nitrate in a large number of Antarctic surface snow and pit samples collected over several years on a transect between the coast and Dome A. Based on a linear model it is concluded that on the coast nitrate flux to the snowpack is dominated by wet deposition illustrated by a positive correlation with accumulation rates, dry deposition contributing up to 44% and atmospheric nitrate being quite homogeneous. Further inland on the Antarctic Plateau a positive correlation between concentration and accumulation rate is found suggestive of post-depositional loss. Contrary to a previous coastal study no association between nitrate and sodium in snow was found, but rather with nss-so<sub>4</sub> suggesting a role of small sized aerosol in nitrate scavenging and deposition.

This study contributes a large number of new observations from remote areas, which involved careful sampling on locations along the traverse, sample handling and analysis, and they clearly merit publication. The finding that no<sub>3</sub> correlates with nss-so<sub>4</sub> but not with na is very interesting and new. The main weakness is the discussion on no<sub>3</sub> deposition processes, which needs significant improvement before I can recommend publication. In particular, a more thorough comparison with other studies and a critical discussion of model choice and interpretation are required.

### **(1) author's response**

We greatly appreciate the reviewer for the general positive comments of our work. We have revised the discussion on NO<sub>3</sub><sup>-</sup> deposition process. In addition, we have expanded the discussion on the potential association between NO<sub>3</sub><sup>-</sup> and co-existing ions in the surface snow, and the possible connections.

In the model section, we now present a detailed description of the model choice and results (please also see the comments from Referee #2).

### **(1) author's changes in manuscript**

Following the reviewer's comments, we substantially revised the discussion section. Please see the revised manuscript, sections **4.1.1 NO<sub>3</sub><sup>-</sup> in coastal snowpack, 4.1.2 NO<sub>3</sub><sup>-</sup> in inland snowpack and 4.2 Effects of coexisting ions on NO<sub>3</sub><sup>-</sup>**

## **(2) comments from Referees**

SPECIFIC COMMENTS - The authors apply a linear model to interpret their data. Contrary to their description Eq. 4-6 are essentially the same model, i.e. inserting Eq.4 into Eq.6 yields Eq.5. I strongly suggest to simplify (use maybe the notation of Alley et al, 1995), explain model assumptions, parameters and limitations. Note this model is the simplest plausible model to relate chemical flux and concentration in snow to atmospheric concentrations introduced more than 20yr ago (Legrand, M., 1987; Alley et al., 1995) and is a gross over-simplification of the complex nature of air-snow exchange of nitrate. It's probably ok near the coast, but fails inland due to post-depositional redistribution and loss of nitrate. Negative dry deposition rates can be interpreted as losses and should also be compared to other studies in the regions, e.g. Pasteris et al. (2014) and Weller et al. (2004, 2007). I suspect that precise values for dry deposition rates and fresh snow values depend which and how many locations are included in the regression analysis (and also to a minor extent if you use regression parameters from eq4 or eq5). The discussion on inland snowpack (Section 4.1.2) should be expanded accordingly; e.g. take a closer look at losses shown in Fig 4, how do they compare to loss rate from the regressions, how do they depend on environmental factors?

## **(2) author's response**

We thank the reviewer for the very helpful comments. We agree with the reviewer that the Eqs. 4-6 represent essentially the same model and can be consolidated. In addition, the parameters and limitations of the model should be clarified. We also agree that the model in this work was introduced 20 years ago (Legrand, 1987; Alley et al., 1995) and is a gross over-simplification of the complicated snow-air exchange of NO<sub>3</sub><sup>-</sup> in Antarctica, especially in the inland Antarctica (Erland et al., 2015; Shi et al., 2015; Bock et al., 2016; Zatko et al., 2016). Although a simple model, it provides a simple approach to compare the processes occurring on the coast versus those inland. In addition, this model can provides useful parameter values in modeling NO<sub>3</sub><sup>-</sup> deposition/preservation at large scale, considering that observations remain sparse across Antarctica (e.g., Zatko, et al., 2016).

Yes, the negative slope of the linear regression between NO<sub>3</sub><sup>-</sup> concentration and inverse snow accumulation rate, i.e., the negative dry deposition rates, can be interpreted as losses of NO<sub>3</sub><sup>-</sup>. The emission rates of NO<sub>3</sub><sup>-</sup> in this investigation can be compared with other reports, e.g., the observations of DML and the Kohnen Station (Weller et al., 2004; Weller and Wagenbach, 2007; Pasteris et al., 2014).

Following the reviewer's suggestion, we re-examined the linear regression between NO<sub>3</sub><sup>-</sup>

concentration and inverse snow accumulation rate. It is found that the regression is significantly influenced by two sites, SP10 and Core2 (~800 km from the coast), featured by high snow accumulation rate ( $> 100 \text{ kg m}^{-2} \text{ a}^{-1}$ ; Table 1 and Fig. 1). Consequently, the dry deposition rates (i.e., slope of the linear regression) were changed when the two sites were excluded for the linear fit. In this case, the dry deposition of  $\text{NO}_3^-$  can be re-calculated for the inland snowpack.

Also, following the reviewer's comment, we calculated the emission flux with the aid of  $\text{NO}_3^-$  profiles at the inland sites, i.e., the difference between the most recent year mean (Fig. 4) and  $\text{NO}_3^-$  concentration in the snow layer accumulated during the year before the most recent year can represent the loss rate of  $\text{NO}_3^-$ . Then, a comparison was made between the observations and the linear model prediction.

## **(2) author's changes in manuscript**

The linear models were simplified and the parameters and the limitations were included, following the notation of Alley et al. (1995).

The negative slope of the linear regression between  $\text{NO}_3^-$  concentration and inverse snow accumulation rate was explained. In addition, the values in this study were compared with previous reports in the regions.

The linear fit was carried out to test that the slope values depend on which and how many locations are included in the regression analysis. Two sites with snow accumulation rate larger than  $100 \text{ kg m}^{-2} \text{ a}^{-1}$  were excluded for the linear fit. Accordingly, the discussion on inland snowpack (Section 4.1.2) was expanded. In addition, the emission rates of  $\text{NO}_3^-$  were calculated from the snowpits  $\text{NO}_3^-$  profiles, and a comparison was made between the observations and linear model prediction.

For the changes, please see the revision-tracked version of manuscript, sections **4.1.1  $\text{NO}_3^-$  in coastal snowpack, and 4.1.2  $\text{NO}_3^-$  in inland snowpack**

## **(3) comments from Referees**

- the authors make surprisingly little mentioning of new isotopic tools in their brief literature review and discussion (including their own study Shi et al., 2014), which in my view achieved significant reduction of the uncertainties related to post-depositional  $\text{NO}_3$  processes and the origin of  $\text{NO}_3$  maxima in Antarctic snow. I'd recommend to highlight better the progress in  $\text{NO}_3$  air-snow exchange research and integrate it into the discussion. You could set out from the beginning that you don't expect your chosen model to work on the Plateau because of strong losses.

## **(3) author's response**

We thank the reviewer for pointing this out. We agree with the reviewer that the isotope ratios of  $\text{NO}_3^-$  provide further constraints for  $\text{NO}_x$  sources and post-depositional processing of  $\text{NO}_3^-$  in the snow. A brief overview of the contributions from isotope ratios of  $\text{NO}_3^-$  in Antarctic snow seems to be necessary in the introduction section, although no isotopic data were presented in this study.

In the discussion of  $\text{NO}_3^-$  losses in the inland snowpack, the previous works on isotopic compositions of  $\text{NO}_3^-$  in snow from Dome A plateau (Shi et al., 2015) was included. In this case, the uncertainties related to post-depositional processing of  $\text{NO}_3^-$  would be reduced. The recent works on the air-snow changes of  $\text{NO}_3^-$  were also included in the discussion (Erbland et al., 2015; Zatzko et al., 2016).

In the section of the model introduction, it is clarified that the model could not well depict the complex recycling of  $\text{NO}_3^-$  in inland Antarctic snow.

### **(3) author's changes in manuscript**

Discussion of advanced understanding based upon  $\text{NO}_3^-$  isotopes was included in the introduction section.

In the discussion section, 4.1.2  $\text{NO}_3^-$  in inland snowpack, previous works on the Dome A plateau were referenced. Also, the previous modeling works on the air-snow transfer of  $\text{NO}_3^-$  were integrated into the discussion.

For the changes, please see the revision-tracked version of manuscript, sections **4.1.1** and **4.1.2**

### **(4) comments from Referees**

- the authors mention their unpublished measurements of atmospheric  $\text{NO}_3^-$  on the coast (1337-38) and on the traverse (426-428). Is there any particular reason why they are not part of a manuscript on air-snow exchange of  $\text{NO}_3^-$ ? I'd like to see these included in the paper, as they could add significantly to the discussion of deposition and association to  $\text{NH}_4^+$  and sea salt (the novel part of this paper).

### **(4) author's response**

We agree with the reviewer that the atmospheric  $\text{NO}_3^-$  could be helpful to the understanding of snow-air exchange of  $\text{NO}_3^-$ . In fact, the atmospheric  $\text{NO}_3^-$  data is a part of another manuscript in preparation, which is focused on the production pathways of atmospheric  $\text{NO}_3^-$  (i.e., the oxidation channels of  $\text{NO}_x$ ) on the traverse from coast to Antarctic ice sheet summit and in the marine boundary layer. Atmospheric  $\text{NO}_3^-$  (both particulate and gaseous  $\text{NO}_3^-$ ) were collected on Whatman G653 glass-fiber filters using a high volume air sampler (HVAS), the concentration and

the isotope ratios of  $\text{NO}_3^-$  ( $\delta^{18}\text{O}$  and  $\Delta^{17}\text{O}$ ) were analyzed. It is noted that the sampling time of the atmospheric  $\text{NO}_3^-$  is different from that of the snow sample collection in this study. Thus, the atmospheric concentration data was taken as a general reference to calculate the dry deposition velocity of  $\text{NO}_3^-$  ( $K_1$  in the main manuscript).

#### (4) author's changes in manuscript

Following the comments of the reviewer, atmospheric concentrations of  $\text{NO}_3^-$  and  $\text{SO}_4^{2-}$  are presented in the supporting information of the paper, and the information on atmospheric  $\text{NO}_3^-$  sampling and analysis, concentration table was included.

#### Atmospheric $\text{NO}_3^-$ sampling and analysis

For investigating  $\text{NO}_3^-$  levels in the atmosphere, atmospheric  $\text{NO}_3^-$ , i.e., both particulate  $\text{NO}_3^-$  and gaseous  $\text{HNO}_3$ , was collected along the traverse (coastal Zhongshan Station to Dome A) following similar protocols for previous work in East Antarctica (Savarino et al., 2007; Frey et al., 2009; Erbland et al., 2013). The atmospheric samples were collected on Whatman G653 glass-fiber filters (8 × 10 in; prebaked at 550 °C for ~24 hr) using a high volume air sampler (HVAS), with a flow rate of ~1.0 m<sup>3</sup> min<sup>-1</sup> for 12-15 hr. In total, 34 atmospheric samples were collected on the traverse.

In the laboratory, each filter was cut into pieces using pre-cleaned scissors that were rinsed between samples, placed in ~100 ml of Milli-Q water, ultrasonicated for 40 min and leached for 24 hr under shaking. The sample solutions were then filtered through 0.22 μm ANPEL PTFE filters for  $\text{NO}_3^-$  concentration analysis.

Ion concentrations ( $\text{NO}_3^-$  and  $\text{SO}_4^{2-}$ ) in extracted solutions were determined using a Dionex ion chromatograph (ICS 3000) following Shi et al. (2012). Final atmospheric  $\text{NO}_3^-$  concentrations were normalized to standard temperature and pressure (273 K; 1013 hPa), listed in Table S1.

Table S1 Atmospheric concentrations of  $\text{NO}_3^-$  and  $\text{SO}_4^{2-}$  on the traverse from coastal Zhongshan Station to Dome A in East Antarctica.

| Sampling location |              | Atmospheric $\text{NO}_3^-/\text{ng m}^{-3}$ | Atmospheric $\text{SO}_4^{2-}/\text{ng m}^{-3}$ |
|-------------------|--------------|----------------------------------------------|-------------------------------------------------|
| Longitude/° E     | Latitude/° S |                                              |                                                 |
| 76.49             | 69.79        | 29                                           | 183                                             |
| 76.92             | 70.64        | 24                                           | 154                                             |
| 77.62             | 71.5         | 22                                           | 204                                             |
| 77.69             | 72.37        | 14                                           | 163                                             |
| 77.17             | 73.15        | 24                                           | 165                                             |
| 76.97             | 73.86        | 30                                           | 117                                             |
| 76.98             | 74.9         | 43                                           | 163                                             |
| 76.82             | 75.87        | 16                                           | 176                                             |
| 77.02             | 76.86        | 41                                           | 289                                             |

|       |       |     |     |
|-------|-------|-----|-----|
| 77.71 | 77.15 | 85  | 268 |
| 76.99 | 78.36 | 139 | 162 |
| 77.00 | 79.01 | 35  | 130 |
| 77.26 | 79.82 | 99  | 177 |
| 77.12 | 80.42 | 183 | 496 |
| 77.12 | 80.42 | 67  | 371 |
| 77.12 | 80.42 | 88  | 341 |
| 77.12 | 80.42 | 100 | 310 |
| 77.12 | 80.42 | 124 | 415 |
| 77.12 | 80.42 | 124 | 317 |
| 77.12 | 80.42 | 81  | 240 |
| 77.12 | 80.42 | 87  | 178 |
| 77.17 | 79.63 | 82  | 228 |
| 77.03 | 78.77 | 21  | 246 |
| 77.19 | 77.83 | 38  | 261 |
| 77.02 | 76.74 | 33  | 257 |
| 77.03 | 76.42 | 40  | 331 |
| 76.83 | 75.87 | 40  | 249 |
| 76.96 | 75.03 | 44  | 256 |
| 77.00 | 74.09 | 32  | 216 |
| 76.97 | 73.86 | 21  | 202 |
| 77.38 | 72.84 | 17  | 225 |
| 77.97 | 71.93 | 8   | 223 |
| 77.19 | 70.97 | 24  | 209 |
| 76.52 | 69.97 | 14  | 188 |

---

For the changes, please see the supporting information of the manuscript.

#### **(5) comments from Referees**

TECHNICAL CORRECTIONS 135 ... dry deposition velocity and scavenging ratio for NO<sub>3</sub><sup>-</sup> was relatively constant near the coast ... is this not a model assumption? which then allows you to state that atmospheric nitrate is homogeneous on the coast, please clarify how you interpret the linear model.

#### **(5) author's response**

Yes, the linear model assumes spatially homogeneous values for the dry deposition velocity. A linear fit in the manuscript (Fig. 5a) supports the assumption of the spatial homogeneity.

#### **(5) author's changes in manuscript**

The assumptions of the interpretation of the linear fit was clarified in the revised manuscript. Then the interpretation of the linear regression parameters (fresh snow concentration and the dry deposition velocity of  $\text{NO}_3^-$ ) was clarified based upon these assumptions, please see section 4.1.1 in the revision-tracked version of the manuscript.

**(6) comments from Referees**

136 ... association ... throughout the text you use association but mean probably correlation. Please change and state R and p value

**(6) author's response**

Thanks for pointing this out. In most cases, the “association” means “correlation”.

**(6) author's changes in manuscript**

Following the reviewer's suggestion, the “association” was replaced with “correlation”. The values of  $R^2$  and  $p$  were also included in the revised manuscript.

**(7) comments from Referees**

155 tropospheric and stratospheric sources

**(7) author's response**

We agree with the reviewer.

**(7) author's changes in manuscript**

The “atmospheric” was replaced with “tropospheric” in the revised manuscript.

**(8) comments from Referees**

175 isotopes show stratospheric origin of nitrate peak in late winter/ early spring (Savarino, 2007; Frey 2009)

**(8) author's response**

Agree with the reviewer.

**(8) author's changes in manuscript**

Changed following the reviewer's suggestion in the revised manuscript.

**(9) comments from Referees**

180-84 it seems to me that the SPE hypothesis has recently been basically refuted; please update your summary & citations including e.g. Wolff et al. (2012 & 2016), Duderstadt et al. (2014)

**(9) author's response**

We agree with the reviewer that the solar proton event (SPE) is generally believed to have negligible effect on the variability of  $\text{NO}_3^-$  in polar ice core at present. The citations have been updated (Wolff et al., 2008; Wolff et al., 2012; Duderstadt et al., 2016; Wolff et al., 2016).

**(9) author's changes in manuscript**

Following the reviewer's comment, the summary has been re-stated, and the citations have been updated. Please see the revision-tracked version of manuscript.

**(10) comments from Referees**

186 ... the relationship ... varies temporally and spatially

**(10) author's response**

Agree with the reviewer.

**(10) author's changes in manuscript**

Changed following the reviewer's suggestion. Please see the revision-tracked version of manuscript.

**(11) comments from Referees**

187-89 more correctly: ... Isotope studies suggest that under cold conditions photolytic loss dominates, whereas  $\text{HNO}_3$  volatilization becomes important at warmer temperatures  $> -20^\circ\text{C}$  (Frey 2009, Erbland 2013, Berhanu 2015)

**(11) author's response**



Thanks for the suggestion.

**(11) author's changes in manuscript**

Restated following the reviewer's suggestion. Please see the revision-tracked version of manuscript.

**(12) comments from Referees**

193 and field measurements on the East Antarctic Plateau at Dome C suggest e-folding depths of 10 to 20 cm (France et al., 2011)

**(12) author's response**

Yes, the field measurements on the East Antarctic Plateau at Dome C suggest  $z_e$  of 10 to 20 cm (France et al., 2011), and the depth is dependent upon the concentration of impurities contained in the snow (Zatko et al., 2013).

**(12) author's changes in manuscript**

Following the reviewer's comments, the statement was rephrased. Please see the revision-tracked version of manuscript.

**(13) comments from Referees**

194-95 Clarify that photolysis dominates loss. This is also in support of your own assumption that  $\text{NO}_3^-$  is archived below the photic zone of  $\sim 1\text{m}$  depth, where temperature still varies on diurnal to annual time scales. It implies that physical losses are assumed to be not important throughout the study region.

**(13) author's response**

We appreciate the reviewer for this point. In the inland regions with low snow accumulation rate, especially on the East Antarctic plateaus, photolysis is thought to dominate the post-depositional losses of  $\text{NO}_3^-$  (Frey et al., 2009; Shi et al., 2015). This point is crucial to our assumption that  $\text{NO}_3^-$  is archived below 100 cm.

**(13) author's changes in manuscript**

This point was clarified following the reviewer's suggestion. Please see the revision-tracked

version of manuscript.

**(14) comments from Referees**

1105 please add also Bertler et al. 2005, Pasteris et al., 2014

**(14) author's response**

Agree.

**(14) author's changes in manuscript**

The two references were included in the revised version (Bertler et al., 2005; Pasteris et al., 2014).

**(15) comments from Referees**

1122 does SP20 correspond to the location of the station at Dome A?

**(15) author's response**

Yes, SP20 corresponds to the location of the Chinese inland station, Kunlun Station at Dome A.

**(15) author's changes in manuscript**

The sampling snowpits were clarified in section **2.2 Sample collection**. In particular, the SP20 located at the Kunlun Station at Dome A was noted. Please see the revision-tracked version of manuscript.

**(16) comments from Referees**

1129 add lat/lon and elevation of station

**(16) author's response**

Agree. The Kunlun Station, 80°25'01.7"S and 77°6'58.0"E, with altitude of 4087 m a.s.l.

**(16) author's changes in manuscript**

Added in the revised manuscript.

**(17) comments from Referees**

1134 took OR lasted 4 summer seasons

**(17) author's response**

Agree. Thanks.

**(17) author's changes in manuscript**

Corrected in the revised manuscript.

**(18) comments from Referees**

1194 add a note that so4 fractionation may introduce a bias in nss-so4 (Wagenbach et al., 1998)

**(18) author's response**

Agree. The  $\text{SO}_4^{2-}$  fractionation (the precipitation of mirabilite ( $\text{Na}_2\text{SO}_4 \cdot 10\text{H}_2\text{O}$ )) may introduce a bias in  $\text{nssSO}_4^{2-}$ , especially during the winter half year (Wagenbach et al., 1998a).

**(18) author's changes in manuscript**

The above sentence was added in the revised manuscript.

**(19) comments from Referees**

1250-52 Please be precise and expand: were the pits dated? do you see 1, 2 or more annual  $\text{NO}_3^-$  peaks?

**(19) author's response**

Agree with the reviewer, the section should be expanded. Among the coastal snowpits, water isotope ratios ( $\delta^{18}\text{O}$  of  $\text{H}_2\text{O}$ ) of samples at SP02 were also determined, thus allowing for investigating  $\text{NO}_3^-$  seasonality (Fig. S2 in supporting information). In general, the  $\delta^{18}\text{O}(\text{H}_2\text{O})$  peaks correspond to high  $\text{NO}_3^-$  concentrations (i.e.,  $\text{NO}_3^-$  peaks present in summer), indicating a seasonal variability. This seasonal signature is consistent with previous observations of  $\text{NO}_3^-$  in snow and atmosphere at the coastal Antarctic sites (Mulvaney et al., 1998; Wagenbach et al., 1998b; Savarino et al., 2007).

**(19) author's changes in manuscript**

Following the reviewer's suggestion, the coastal SP02 snowpit was taken as an example to examine the seasonal signature of  $\text{NO}_3^-$ .

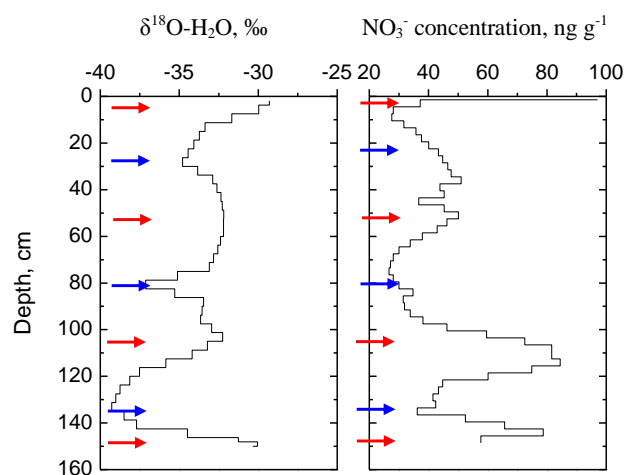

Figure S3 Profiles of  $\delta^{18}\text{O}$  of  $\text{H}_2\text{O}$  (left panel) and  $\text{NO}_3^-$  concentration (right panel) in the coastal snowpit SP02. Red and blue arrows represent the middle of the identified warm and cold seasons, respectively. Red solid arrows and blue dashed arrows represent the middle of the identified warm and cold seasons, respectively. One seasonal cycle represents one  $\delta^{18}\text{O}(\text{H}_2\text{O})$  local maxima peak to the next.

For the changes, please see the revision-tracked version of manuscript (section 3.2 Snowpit  $\text{NO}_3^-$  concentrations) and the supporting information Figure S3.

**(20) comments from Referees**

1256 careful with language: not maybe, but yes previous studies inland (on the Antarctic Plateau) have shown that the decrease is due to significant loss/redistribution of  $\text{NO}_3^-$

**(20) author's response**

Agree with the reviewer. The significant losses are resulted from the post-depositional processing of  $\text{NO}_3^-$  (e.g., at Dome C; Frey et al., 2009; Erbland et al., 2013)

**(20) author's changes in manuscript**

Corrected in the revised manuscript.

**(21) comments from Referees**

1279-80 due to photolysis

**(21) author's response**

Agree. Thanks.

**(21) author's changes in manuscript**

Corrected.

**(22) comments from Referees**

1290-94 note you assume that photolysis is main loss process which is sensible, but explain better in intro (see comment on 194-95)

**(22) author's response**

We agree with the reviewer. Thanks.

**(22) author's changes in manuscript**

Following the reviewer's suggestion, this point was explained in the introduction.

**(23) comments from Referees**

1302 do you mean deposition velocity or flux? explain model assumptions (see above)

**(23) author's response**

We mean the dry deposition flux of  $\text{NO}_3^-$ . The assumptions of the interpretation of the linear model are spatial homogeneity of fresh snow  $\text{NO}_3^-$  levels and dry deposition flux in the regions, which were explained in the revised manuscript.

**(23) author's changes in manuscript**

Following the reviewer's suggestion, this section was re-organized. Please see the revision-tracked version of manuscript (section **4.1.1  $\text{NO}_3^-$  in coastal snowpack**).

**(24) comments from Referees**

l306, 329-30 consolidate your model (see above)

**(24) author's response**

Agree with the reviewer.

**(24) author's changes in manuscript**

This section was re-organized. Please see the revised manuscript (section **4.1.1 NO<sub>3</sub><sup>-</sup> in coastal snowpack**).

**(25) comments from Referees**

l311 use consistently r or r<sup>2</sup> throughout the paper, and include p value

**(25) author's response**

Agree.

**(25) author's changes in manuscript**

Corrected throughout the manuscript, following the reviewer's suggestion.

**(26) comments from Referees**

l337-38 are these annual mean and std of atmospheric nitrate? Coastal observations (Neumayer, Halley, DDU) show a distinct annual cycle. how would that affect your estimate of deposition velocity?

**(26) author's response**

The data is the average atmospheric NO<sub>3</sub><sup>-</sup> concentration (19.4 ng m<sup>-3</sup>) on the coast during the austral summer time. According to previous coastal observations (e.g., Dumont d'Urville, Neumayer and Halley), atmospheric NO<sub>3</sub><sup>-</sup> concentration exhibits a seasonal variation with maximum usually observed in late spring-summer (Mulvaney et al., 1998; Wagenbach et al., 1998b; Savarino et al., 2007). In those studies, the atmospheric NO<sub>3</sub><sup>-</sup> concentration mainly varied from 10 to 70 ng m<sup>-3</sup>. For the calculation of the dry deposition velocity (K<sub>1</sub>) in this study, a lower

atmospheric  $\text{NO}_3^-$  concentration will yield a higher value of  $K_1$ . This point is clarified in the revised manuscript.

**(26) author's changes in manuscript**

A notation was added in the revised version, as follows,

It is noted that the true  $K_1$  value could be higher than the calculation here due to the high atmospheric  $\text{NO}_3^-$  concentrations in summertime on the coast (Mulvaney et al., 1998; Wagenbach et al., 1998b; Savarino et al., 2007).

For the changes, please see the revision-tracked version of manuscript (section **4.1.1  $\text{NO}_3^-$  in coastal snowpack**).

**(27) comments from Referees**

l340 "... compares well to ..." I disagree, this is a large uncertainty, a range of 0.5 to 0.8 cm/s can make a big difference when modeling  $\text{NO}_3^-$  in surface snow (see for example Erbland et al. 2013, Fig.7)

**(27) author's response**

We thank the reviewer for pointing this out. Yes, a difference of  $0.3 \text{ cm s}^{-1}$  will result in a large difference when modeling  $\text{NO}_3^-$  in the surface snowpack (Erbland et al., 2013).

**(27) author's changes in manuscript**

This sentence was re-written. Please see the revised manuscript.

**(28) comments from Referees**

l352 is negatively correlated with

**(28) author's response**

Agree.

**(28) author's changes in manuscript**

The “tied to” is replaced with “correlated with”.

**(29) comments from Referees**

1354 based on what exactly? the R value? please explain

**(29) author's response**

Yes, based on  $R^2$  values of the regression analysis (Figs. 5b and c). A strong positive correlation between  $\text{NO}_3^-$  flux and snow accumulation rate ( $R^2=0.97$ ), while a negative relationship between flux and the archived concentration of  $\text{NO}_3^-$  was found. In this case, it is proposed that  $\text{NO}_3^-$  flux is more accumulation dependent compared to the concentration.

**(29) author's changes in manuscript**

Clarified in the revised manuscript.

**(30) comments from Referees**

1365 correlation

**(30) author's response**

Agree.

**(30) author's changes in manuscript**

Replaced with “correlation”.

**(31) comments from Referees**

1370 the correlation ... is relatively weak and of opposite sign

**(31) author's response**

Agree.

**(31) author's changes in manuscript**

Replaced with “correlation”.



**(32) comments from Referees**

1375 why act surprised? we know based on previous work that this is of course due to losses, the model application is limited inland

**(32) author's response**

Agree.

**(32) author's changes in manuscript**

Following the reviewer's suggestion, this part is re-phrased.

**(33) comments from Referees**

1404-05 but uncertainties have been reduced over the last decade (see comment above)

**(33) author's response**

Agree with the reviewer.

**(33) author's changes in manuscript**

This sentence was rephrased.

**(34) comments from Referees**

1406 and snow optical properties (e-folding depth)

**(34) author's response**

Agree.

**(34) author's changes in manuscript**

Changed.

**(35) comments from Referees**

1426-428 I'd be very interested to see the atmospheric data; why are they not included in this

manuscript?

**(35) author's response**

Agree with the reviewer. See response above.

**(35) author's changes in manuscript**

The atmospheric data was included in the supporting information.

**(36) comments from Referees**

1463-464 I don't understand, please expand (mirabilite is  $\text{Na}_2\text{SO}_4 \cdot 10\text{H}_2\text{O}$ )

**(36) author's response**

The fractionation of  $\text{Na}^+$  can occur due to mirabilite precipitation in sea-ice formation at  $< -8^\circ\text{C}$  (Marion et al., 1999), possibly leading to the positive  $\text{nssCl}^-$ . Even if all of  $\text{SO}_4^{2-}$  in sea water is removed via mirabilite precipitation, only 12% of sea salt  $\text{Na}^+$  is lost (Rankin et al., 2002). Considering the smallest sea ice extent in summertime in East Antarctica (Holland et al., 2014), the very high  $\text{Cl}^-/\text{Na}^+$  ratio (mean = 2.1 versus 1.17 of sea water, in  $\mu\text{eq L}^{-1}$ ) in surface snow is unlikely from sea-salt fractionation associated with mirabilite precipitation in sea-ice formation.

**(36) author's changes in manuscript**

Following the reviewer's suggestion, this point was expanded. Please see section **4.2 Effects of coexisting ions on  $\text{NO}_3^-$**  in the revised manuscript.

**(37) comments from Referees**

FIGURES

Fig3 possibly add accumulation rate into ea figure to understand better at which threshold  $\text{no}_3$  spikes disappear

**(37) author's response**

Agree.

**(37) author's changes in manuscript**

Snow accumulation was added in each panel in Fig. 3, as below.

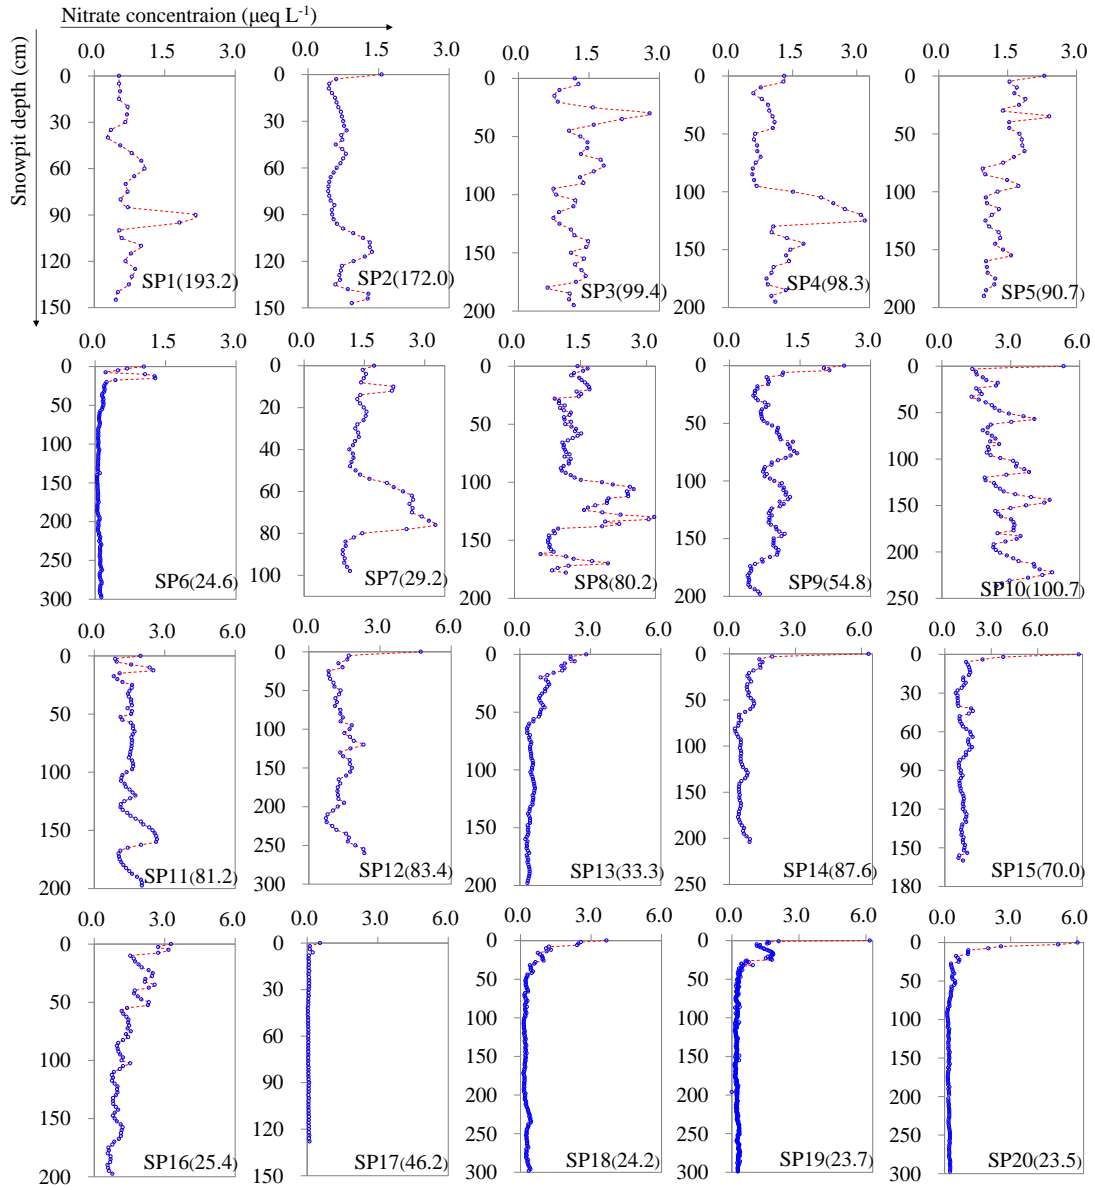

**Figure 3.** The full profiles of  $\text{NO}_3^-$  concentrations for snowpits collected on the traverse from the coast to Dome A, East Antarctica (SP1 is closest the coast; SP20 the furthest inland; see Figure 2). The details on sampling of the snowpits refer to Table 1. The numbers in parentheses in each panel denote the annual snow accumulation rates ( $\text{kg m}^{-2} \text{a}^{-1}$ ). Note that the scales of x-axes for the snowpits SP1 – SP9 and SP10 – SP 20 are different.

**(38) comments from Referees**

Fig4 possibly add site ID on the x-Axis to follow better the discussion

**(38) author's response**

Agree with the reviewer.

**(38) author's changes in manuscript**

Site ID was added on the x-axis. Please see the revised manuscript Fig. 4, as below.

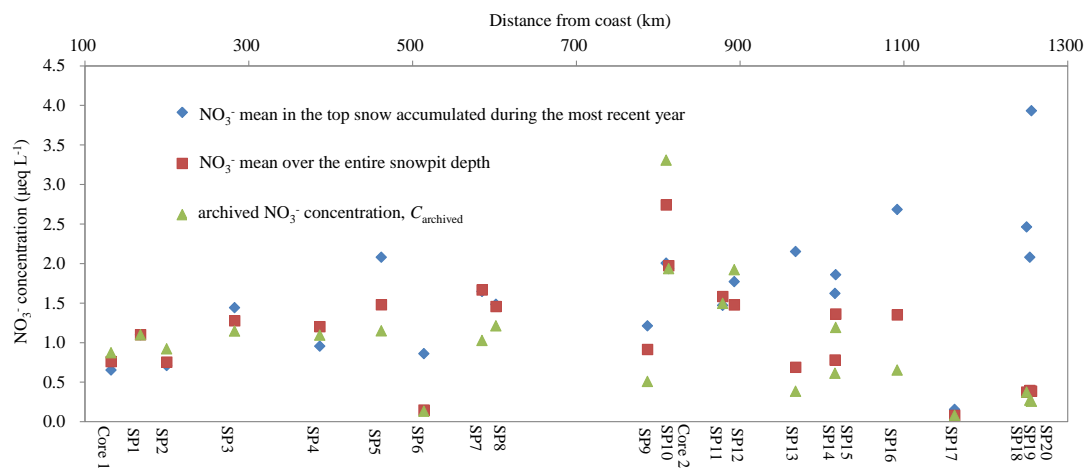

**Figure 4.** Mean concentrations of  $\text{NO}_3^-$  for the entire snowpit depth (in square), the uppermost layer covering one-year snow accumulation (in diamond) and the bottom layer covering a full annual cycle of deposition (archived  $\text{NO}_3^-$  concentration,  $C_{\text{archived}}$ , in triangle).

**(39) comments from Referees**

Fig5 improve figure readability (size, label font)

**(39) author's response**

Agree.

**(39) author's changes in manuscript**

Changed.

**End of responses to Referee #1.**

## References

- Alley, R., Finkel, R., Nishizumi, K., Anandakrishnan, A., Shuman, C., Mershon, G., Zielinski, G., and Mayewski, P.A.: Changes in continental and sea-salt atmospheric loadings in central Greenland during the most recent deglaciation: Model-based estimates, *J. Glaciol.*, 41, 503-514, 1995.
- Barrie, L.A.: Scavenging ratios, wet deposition, and in-cloud oxidation: An application to the oxides of sulphur and nitrogen, *J. Geophys. Res.*, 90, 5789–5799, 1985.
- Berhanu, T.A., Meusinger, C., Erbland, J., Jost, R., Bhattacharya, S., Johnson, M.S., and Savarino, J.: Laboratory study of nitrate photolysis in Antarctic snow. II. Isotopic effects and wavelength dependence, *J. Chem. Phys.*, 140, 244306, doi:10.1063/1.4882899, 2014.
- Berhanu, T.A., Savarino, J., Erbland, J., Vicars, W.C., Preunkert, S., Martins, J.F., and Johnson, M.S.: Isotopic effects of nitrate photochemistry in snow: a field study at Dome C, Antarctica, *Atmos. Chem. Phys.*, 15, 11243-11256, doi:10.5194/acp-15-11243-2015, 2015.
- Bertler, N., Mayewski, P.A., Aristarain, A., Barrett, P., Becagli, S., Bernardo, R., Bo, S., Xiao, C., Curran, M., and Qin, D.: Snow chemistry across Antarctica, *Ann. Glaciol.*, 41, 167-179, 2005.
- Bock, J., Savarino, J., and Picard, G.: Air–snow exchange of nitrate: a modelling approach to investigate physicochemical processes in surface snow at Dome C, Antarctica, *Atmos. Chem. Phys.*, 16, 12531-12550, doi:10.5194/acp-16-12531-2016, 2016.
- Brown, S., Ryerson, T., Wollny, A., Brock, C., Peltier, R., Sullivan, A., Weber, R., Dube, W., Trainer, M., and Meagher, J.: Variability in nocturnal nitrogen oxide processing and its role in regional air quality, *Science*, 311, 67-70, doi:10.1126/science.1120120, 2006.
- Cragin, J., and McGilvary, R., 1995. Can inorganic chemical species volatilize from snow?, in: Tonnessen, K.A., Williams, M.W., Tranter, M. (Eds.), *Biogeochemistry of Seasonally Snow-Covered Catchments*. IAHS Press, Wallingford, UK, pp. 11-16.
- Duderstadt, K.A., Dibb, J.E., Jackman, C.H., Randall, C.E., Solomon, S.C., Mills, M.J., Schwadron, N.A., and Spence, H.E.: Nitrate deposition to surface snow at Summit, Greenland, following the 9 November 2000 solar proton event, *J. Geophys. Res.*, 119, 6938-6957, 2014.
- Duderstadt, K.A., Dibb, J.E., Schwadron, N.A., Spence, H.E., Solomon, S.C., Yudin, V.A.,

Jackman, C.H., and Randall, C.E.: Nitrate ion spikes in ice cores not suitable as proxies for solar proton events, *J. Geophys. Res.*, 121, 2994-3016, doi:10.1002/2015JD023805, 2016.

Erbland, J., Savarino, J., Morin, S., France, J.L., Frey, M.M., and King, M.D.: Air-snow transfer of nitrate on the East Antarctic plateau -Part 2: An isotopic model for the interpretation of deep ice-core records, *Atmos. Chem. Phys.*, 15, 12079–12113, doi:10.5194/acp-15-12079-2015, 2015.

Erbland, J., Vicars, W., Savarino, J., Morin, S., Frey, M., Frosini, D., Vince, E., and Martins, J.: Air-snow transfer of nitrate on the East Antarctic Plateau - Part 1: Isotopic evidence for a photolytically driven dynamic equilibrium in summer, *Atmos. Chem. Phys.*, 13, 6403-6419, doi:10.5194/acp-13-6403-2013, 2013.

France, J., King, M., Frey, M., Erbland, J., Picard, G., Preunkert, S., MacArthur, A., and Savarino, J.: Snow optical properties at Dome C (Concordia), Antarctica; implications for snow emissions and snow chemistry of reactive nitrogen, *Atmos. Chem. Phys.*, 11, 9787-9801, doi:10.5194/acp-11-9787-2011, 2011.

Frey, M.M., Savarino, J., Morin, S., Erbland, J., and Martins, J.: Photolysis imprint in the nitrate stable isotope signal in snow and atmosphere of East Antarctica and implications for reactive nitrogen cycling, *Atmos. Chem. Phys.*, 9, 8681-8696, 2009.

Ginot, P., Kull, C., Schwikowski, M., Schotterer, U., and Gäggeler, H.W.: Effects of postdepositional processes on snow composition of a subtropical glacier (Cerro Tapado, Chilean Andes), *J. Geophys. Res.*, 106, 32375-32386, 2001.

Hara, K., Nakazawa, F., Fujita, S., Fukui, K., Enomoto, H., and Sugiyama, S.: Horizontal distributions of aerosol constituents and their mixing states in Antarctica during the JASE traverse, *Atmos. Chem. Phys.*, 14, 10211-10230, doi:10.5194/acp-14-10211-2014, 2014.

Hara, K., Osada, K., Kido, M., Matsunaga, K., Iwasaka, Y., Hashida, G., and Yamanouchi, T.: Variations of constituents of individual sea-salt particles at Syowa station, Antarctica, *Tellus B*, 57, 230-246, 2005.

Holland, P.R., Bruneau, N., Enright, C., Losch, M., Kurtz, N.T., and Kwok, R.: Modeled Trends in Antarctic Sea Ice Thickness, *J. Climate*, 27, 3784-3801, doi:10.1175/JCLI-D-13-00301.1, 2014.

Jourdain, B., and Legrand, M.: Year - round records of bulk and size - segregated aerosol composition and HCl and HNO<sub>3</sub> levels in the Dumont d'Urville (coastal Antarctica) atmosphere: Implications for sea - salt aerosol fractionation in the winter and summer, *J. Geophys. Res.*, 107, ACH 20-21 – ACH 20-13, doi:10.1029/2002JD002471, 2002.

Kasper-Giebl, A., Kalina, M.F., and Puxbaum, H.: Scavenging ratios for sulfate, ammonium and nitrate determined at Mt. Sonnblick (3106m a.s.l.), *Atmos. Environ.*, 33, 895-906, 1999.

Laluraj, C., Thamban, M., Naik, S., Redkar, B., Chaturvedi, A., and Ravindra, R.: Nitrate records of a shallow ice core from East Antarctica: Atmospheric processes, preservation and climatic implications, *The Holocene*, 21, 351-356, doi:10.1177/0959683610374886, 2010.

Lee, H.-M., Henze, D.K., Alexander, B., and Murray, L.T.: Investigating the sensitivity of surface-level nitrate seasonality in Antarctica to primary sources using a global model, *Atmos. Environ.*, 89, 757-767, doi:10.1016/j.atmosenv.2014.03.003, 2014.

Legrand, M.: Chemistry of Antarctic snow and ice, *Le Journal De Physique Colloques*, 48, C1-77-C71-86, 1987.

Legrand, M., and Kirchner, S.: Origins and variations of nitrate in South Polar precipitation, *J. Geophys. Res.*, 95, 3493-3507 1990.

Legrand, M., Preunkert, S., Weller, R., Zipf, L., Elsässer, C., Merchel, S., Rugel, G., and Wagenbach, D.: Year-round record of bulk and size-segregated aerosol composition in central Antarctica (Concordia site) – Part 2: Biogenic sulfur (sulfate and methanesulfonate) aerosol, *Atmos. Chem. Phys.*, 17, 14055-14073, doi:10.5194/acp-17-14055-2017, 2017a.

Legrand, M., Preunkert, S., Wolff, E., Weller, R., Jourdain, B., and Wagenbach, D.: Year-round records of bulk and size-segregated aerosol composition in central Antarctica (Concordia site) – Part 1: Fractionation of sea-salt particles, *Atmos. Chem. Phys.*, 17, 14039-14054, doi:10.5194/acp-17-14039-2017, 2017b.

Legrand, M., Wolff, E., and Wagenbach, D.: Antarctic aerosol and snowfall chemistry: implications for deep Antarctic ice-core chemistry, *Ann. Glaciol.*, 29, 66-72, 1999.

Legrand, M., Yang, X., Preunkert, S., and Theys, N.: Year-round records of sea salt, gaseous, and particulate inorganic bromine in the atmospheric boundary layer at coastal (Dumont d'Urville) and central (Concordia) East Antarctic sites, *J. Geophys. Res.*, 121, 2015JD024066, doi:10.1002/2015JD024066, 2016.

Legrand, M.R., and Delmas, R.J.: Soluble impurities in four Antarctic ice cores over the last 30,000 years, *Ann. Glaciol.*, 10, 116-120, 1988.

Legrand, M.R., Stordal, F., Isaksen, I.S.A., and Rognerud, B.: A model study of the stratospheric budget of odd nitrogen, including effects of solar cycle variations, *Tellus Series B-chemical & Physical Meteorology*, 41B, 413–426, doi:10.1111/j.1600- 0889.1989.tb00318.x, 1989.

Ma, Y., Bian, L., Xiao, C., Allison, I., and Zhou, X.: Near surface climate of the traverse route from Zhongshan Station to Dome A, East Antarctica, *Antarct. Sci.*, 22, 443-459, doi:10.1017/S0954102010000209, 2010.

Marion, G., Farren, R., and Komrowski, A.: Alternative pathways for seawater freezing, *Cold Reg. Sci. Technol.*, 29, 259-266, 1999.

Mulvaney, R., Wagenbach, D., and Wolff, E.W.: Postdepositional change in snowpack nitrate from observation of year-round near-surface snow in coastal Antarctica, *J. Geophys. Res.*, 103, 11021-11031, 1998.

Parish, T.R., and Bromwich, D.H.: Reexamination of the near-surface airflow over the Antarctic continent and implications on atmospheric circulations at high southern latitudes, *Mon. Weather. Rev.*, 135, 1961-1973, doi:10.1175/MWR3374.1, 2007.

Pasteris, D., McConnell, J.R., Edwards, R., Isaksson, E., and Albert, M.R.: Acidity decline in Antarctic ice cores during the Little Ice Age linked to changes in atmospheric nitrate and sea salt concentrations, *J. Geophys. Res.*, 119, 5640-5652, doi:10.1002/2013JD020377, 2014.

Piel, C., Weller, R., Huke, M., and Wagenbach, D.: Atmospheric methane sulfonate and non-sea-salt sulfate records at the European Project for Ice Coring in Antarctica (EPICA) deep-drilling site in Dronning Maud Land, Antarctica, *J. Geophys. Res.*, 111, -, 2006.

Röthlisberger, R., Hutterli, M.A., Sommer, S., Wolff, E.W., and Mulvaney, R.: Factors controlling nitrate in ice cores: Evidence from the Dome C deep ice core, *J. Geophys. Res.*, 105, 20565-20572, 2000.

Rankin, A.M., and Wolff, E.W.: A year-long record of size-segregated aerosol composition at Halley, Antarctica, *J. Geophys. Res.*, 108, -, 2003.

Rankin, A.M., Wolff, E.W., and Martin, S.: Frost flowers: Implications for tropospheric chemistry and ice core interpretation, *J. Geophys. Res.*, 107, AAC 4-1–AAC 4-15, 2002.

Riikonen, S., Parkkinen, P., Halonen, L., and Gerber, R.B.: Ionization of acids on the quasi-liquid layer of ice, *J. Phys. Chem. A*, 118, 5029-5037, doi:10.1021/jp505627n, 2014.

Sato, K., Takenaka, N., Bandow, H., and Maeda, Y.: Evaporation loss of dissolved volatile substances from ice surfaces, *J. Phys. Chem.*, 112, 7600-7607, doi:10.1021/jp075551r, 2008.

Savarino, J., Kaiser, J., Morin, S., Sigman, D.M., and Thiemens, M.H.: Nitrogen and oxygen isotopic constraints on the origin of atmospheric nitrate in coastal Antarctica, *Atmos. Chem. Phys.*, 7, 1925-1945, 2007.

Shi, G., Buffen, A.M., Hastings, M.G., Li, C., Ma, H., Li, Y., Sun, B., An, C., and Jiang, S.: Investigation of post-depositional processing of nitrate in East Antarctic snow: isotopic constraints on photolytic loss, re-oxidation, and source inputs, *Atmos. Chem. Phys.*, 15, 9435–9453,



doi:10.5194/acp-15-9435-2015, 2015.

Shi, G., Li, Y., Jiang, S., An, C., Ma, H., Sun, B., and Wang, Y.: Large-scale spatial variability of major ions in the atmospheric wet deposition along the China Antarctica transect (31° N~ 69° S), *Tellus B*, 64, 17134, doi:10.3402/tellusb.v64i0.17134, 2012.

Shrestha, A., Wake, C., Dibb, J., and Whitlow, S.: Aerosol and Precipitation Chemistry at a Remote Himalayan Site in Nepal, *Aerosol Science & Technology*, 36, 441-456, 2002.

Sigl, M., Fudge, T.J., Winstrup, M., Coledai, J., Ferris, D., McConnell, J.R., Taylor, K.C., Welten, K.C., Woodruff, T.E., and Adolphi, F.: The WAIS Divide deep ice core WD2014 chronology - Part 2: Annual-layer counting (0-31 ka BP), *Clim. Past*, 11, 3425-3474, 2016.

Traversi, R., Becagli, S., Brogioni, M., Caiazzo, L., Ciardini, V., Giardi, F., Legrand, M., Macelloni, G., Petkov, B., Preunkert, S., Scarchilli, C., Severi, M., Vitale, V., and Udisti, R.: Multi-year record of atmospheric and snow surface nitrate in the central Antarctic plateau, *Chemosphere*, 172, 341-354, doi:10.1016/j.chemosphere.2016.12.143, 2017.

Traversi, R., Udisti, R., Frosini, D., Becagli, S., Ciardini, V., Funke, B., Lanconelli, C., Petkov, B., Scarchilli, C., and Severi, M.: Insights on nitrate sources at Dome C (East Antarctic Plateau) from multi-year aerosol and snow records, *Tellus B*, 66, 22550, doi:10.3402/tellusb.v66.22550, 2014.

Traversi, R., Usoskin, I., Solanki, S., Becagli, S., Frezzotti, M., Severi, M., Stenni, B., and Udisti, R.: Nitrate in Polar Ice: A New Tracer of Solar Variability, *Sol. Phys.*, 280, 237-254, 2012.

Udisti, R., Becagli, S., Benassai, S., Castellano, E., Fattori, I., Innocenti, M., Migliori, A., and Traversi, R.: Atmospheresnow interaction by a comparison between aerosol and uppermost snow-layers composition at Dome C, East Antarctica, *Ann. Glaciol.*, 39, 53-61, 2004.

Wagenbach, D., Ducroz, F., Mulvaney, R., Keck, L., Minikin, A., Legrand, M., Hall, J.S., and Wolff, E.W.: Sea-salt aerosol in coastal Antarctic regions, *J. Geophys. Res.*, 103, 10961-10974, 1998a.

Wagenbach, D., Legrand, M., Fischer, H., Pichlmayer, F., and Wolff, E.W.: Atmospheric near-surface nitrate at coastal Antarctic sites, *J. Geophys. Res.*, 103, 11007-11020, 1998b.

Weller, R., Traufetter, F., Fischer, H., Oerter, H., Piel, C., and Miller, H.: Postdepositional losses of methane sulfonate, nitrate, and chloride at the European Project for Ice Coring in Antarctica deep-drilling site in Dronning Maud Land, Antarctica, *J. Geophys. Res.*, 109, 1-9, doi:10.1029/2003JD004189, 2004.

Weller, R., and Wagenbach, D., 2007. Year-round chemical aerosol records in continental Antarctica obtained by automatic samplings.

Wolff, E.W., 1995. Nitrate in polar ice, in: Delmas, R.J. (Ed.), in Ice core studies of global biogeochemical cycles. Springer, New York, pp. 195-224.

Wolff, E.W., Barbante, S., Becagle, S., Bigler, M., Boutron, C.F., Castellano, E., de Angelis, M., and Federer, U.: Changes in environment over the last 800,000 years from chemical analysis of the EPICA Dome C ice core, *Quaternary Sci. Rev.*, 29, 285-295, 2010.

Wolff, E.W., Bigler, M., Curran, M., Dibb, J., Frey, M., Legrand, M., and McConnell, J.: The Carrington event not observed in most ice core nitrate records, *Geophys. Res. Lett.*, 39, L08503, doi:10.1029/2012GL051603, 2012.

Wolff, E.W., Bigler, M., Curran, M.A.J., Dibb, J.E., Frey, M.M., Legrand, M., and McConnell, J.R.: Comment on “Low time resolution analysis of polar ice cores cannot detect impulsive nitrate events” by D.F. Smart et al, *J. Geophys. Res.*, 121, 1920-1924, 2016.

Wolff, E.W., Jones, A.E., Bauguitte, S.-B., and Salmon, R.A.: The interpretation of spikes and trends in concentration of nitrate in polar ice cores, based on evidence from snow and atmospheric measurements, *Atmos. Chem. Phys.*, 8, 5627-5634, 2008.

Zatko, M., Grenfell, T., Alexander, B., Doherty, S., Thomas, J., and Yang, X.: The influence of snow grain size and impurities on the vertical profiles of actinic flux and associated NO<sub>x</sub> emissions on the Antarctic and Greenland ice sheets, *Atmos. Chem. Phys.*, 13, 3547-3567, doi:10.5194/acp-13-3547-2013, 2013.

Zatko, M.C., Geng, L., Alexander, B., Sofen, E.D., and Klein, K.: The impact of snow nitrate photolysis on boundary layer chemistry and the recycling and redistribution of reactive nitrogen across Antarctica and Greenland in a global chemical transport model, *Atmos. Chem. Phys.*, 16, 2819-2842, doi:10.5194/acp-16-2819-2016, 2016.

Zeller, E.J., Dreschhoff, G.A., and Laird, C.M.: Nitrate flux on the Ross Ice Shelf, Antarctica and its relation to solar cosmic rays, *Geophys. Res. Lett.*, 13, 1264-1267, 1986.

**End of the responses.**
